# Supplementary material
Source: PubMed Central journal article supplement (PMC385229)

single stranded mRNA population

-----AAAAAAAA

**cDNA first strand synthesis  
polyC tailing by RTase**

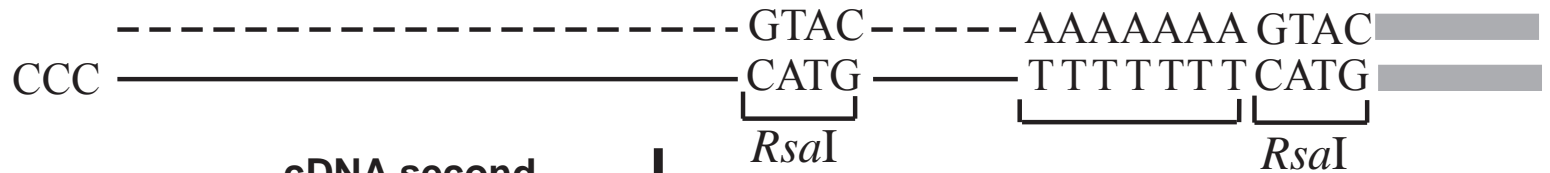

**cDNA second  
strand synthesis**

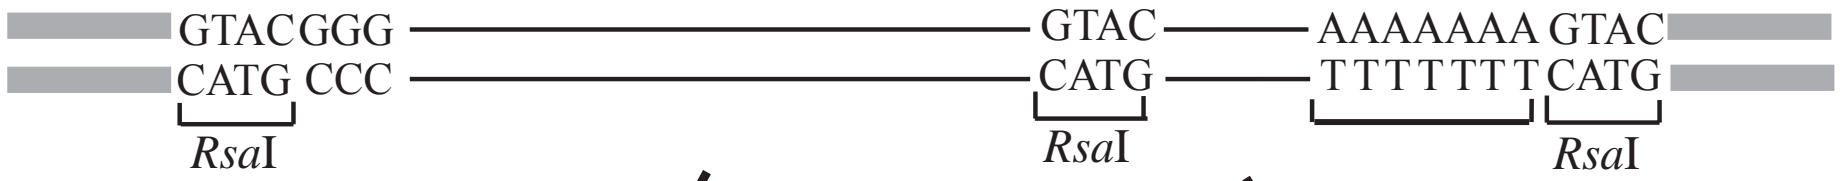

***RsaI* digestion**

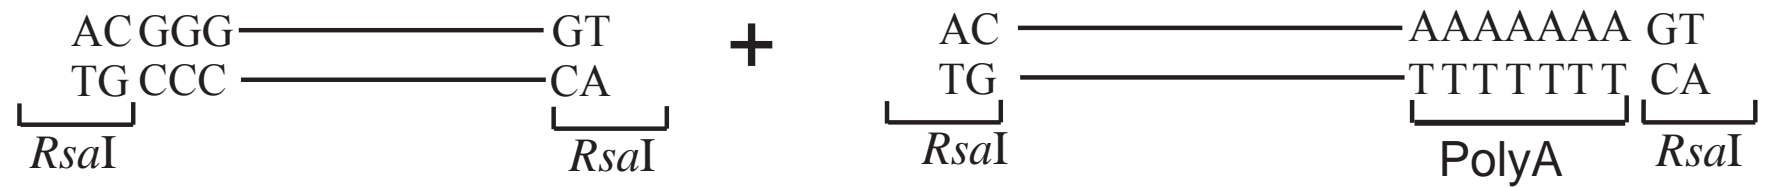

Supplement: 1471-2229-4-3-S2.pdf [file 1471-2229-4-3-S2.pdf]
